# Supplementary material for: Application of ¹H NMR-based metabolomics in childhood leukemia. A preliminary study.
Source: Research Square preprint supplement (doi:10.21203/rs.3.rs-5950449/v1), 2025-02-19
Supplement: Supplementary file 1 [file 91a01fff6d020b0ce7ff69e0.xlsx]

## Sheet: healthy children plasma_
Wzrost [cm]	Wiek [lata]	Płeć [K/M]	Wyniki badań krwi - morfologia [Krwinki białe (WBC)][wynik badania]	Wyniki badań krwi - morfologia [Krwinki czerwone (RBC)][wynik badania]	Wyniki badań krwi - morfologia [Hemoglobina][wynik badania]	Wyniki badań krwi - morfologia [Hematokryt][wynik badania]	Wyniki badań krwi - morfologia [MCV][wynik badania]	Wyniki badań krwi - morfologia [MCH][wynik badania]	Wyniki badań krwi - morfologia [MCHC][wynik badania]	Wyniki badań krwi - morfologia [Płytki krwi][wynik badania]	Wyniki badań krwi - morfologia [RDW-CV][wynik badania]	Wyniki badań krwi - morfologia [MPV][wynik badania]	Wyniki badań krwi - morfologia [liczba neutrocytów][wynik badania]	Wyniki badań krwi - morfologia [liczba limfocytów][wynik badania]	Wyniki badań krwi - morfologia [liczba monocytów][wynik badania]	Wyniki badań krwi - morfologia [liczba eozynocytów][wynik badania]	Wyniki badań krwi - morfologia [liczba bazocytów][wynik badania]	Wyniki badań krwi - morfologia [% neutrocytów][wynik badania]	Wyniki badań krwi - morfologia [% limfocytów ][wynik badania]	Wyniki badań krwi - morfologia [% monocytów][wynik badania]	Wyniki badań krwi - morfologia [% eozynocytów][wynik badania]	Wyniki badań krwi - morfologia [% bazocytów][wynik badania]	Wyniki badań krwi - biochemia podstawowa [Glukoza][wynik badania]	NMR chemical shift [ppm] - 1H NMR (600 MHz, H2O+D2O)	formate	arginine	αH1 glucose	glucose	βH2 glucose	creatinine	citrate	aceton	acetoacetate	alanina	lactate	β-hydroxybutyrate	valina	leucyna	isoleucyna	glycine	glutamina	phenylalanine	histamina	uridine dipphoshate-glucose	glycerophospocholine (GPC)	guanosine monophoshate (GMP)	phospocholine	citrulline	lysine
168	14	M	4,34	4,96	14,3	43,6	87,9	28,9	32,9	148	13,8	11,5	1,95	1,78	0,5	0,09	0,02	44,8	41,2	11,5	2	0,5	82		8.33	1.58	5.16	4.01	3.29	3.04	2.52	2.24	1.92	1,41sh	4.17	1.21	1.05	0.91	0.9	3.55	2.44	7.4	7.65	5.67	3.24	8.13	3.22	3.14	1.79
156	13	K	5,19	4,71	13,5	40,9	86,7	28,6	33	218	13,3	10,4	1,95	2,61	0,41	0,17	0,03	37,8	50,3	7,9	3,4	0,6	83		8.33	1.58	5.18	4.01	3.31	3.04	2.52	2.24	1.91	1.42	4.17	1.21	1.04	0.94	0.9	3.55	2.44	7.46	7.65	5.67	3.26	8.14	3.22	3.13	1.76
171	16	M	6,86	4,82	15	45	93,4	31,2	33,4	173	13,2	11,5	4,04	1,91	0,74	0,13	0,02	58,9	28	10,9	1,9	0,3	66		8.33	1.58	5.17	4.01	3.31	3.04	2.52	2.24	1.91	1.42	4.17	1.21	1.04	0.92	0.9	3.55	2.44	7.46	7.65	5.67	3.23	8.14	3.22	3.13	1.79
159	12	K	6,33	4,77	13,1	38,8	81,3	27,4	33,6	221	14,7	9	2,81	2,86	0,43	0,19	0,02	44,5	45,4	6,8	3	0,3	86		8.34	1.57	5.13	4.01	3.28	3.02	2.52	2.26	1.91	1.42	4.17	1.21	1.06	0.96	0.92	3.55	2.44	7.46	7.64	5.67	3.24	8.13	3.24	3.17	1.74
170	15	M	3,77	5,24	16,1	48	91,7	30,8	33,6	181	13,3	9,4	1,68	1,53	0,47	0,08	0,01	44,2	40,6	12,6	2,2	0,4	84		8.34	1.57	5.13	4.01	3.28	3.04	2.52	2.26	1.91	1.44	4.16	1.22	1.06	0.96	0.95	3.55	2.44	7.46	7.65	5.68	3.24	8.14	3.24	3.17	1.75
160	17	K	6,08	4,5	14,7	43,9	97,4	32,6	33,5	228	12,8	9,6	3,64	1,71	0,6	0,08	0,03	60	28,3	9,9	1,3	0,5	84		8.33	1.58	5.17	4.01	3.28	3.02	2.52	2.27	1.91	1.42	4.17	1.21	1.05	0.94	0.92	3.55	2.44	7.46	7.67	5.67	3.23	8.13	3.22	3.17	1.76
140	12	K	4,36	4,39	13,4	39,4	89,6	30,5	34	206	13,6	9,8	1,63	2,06	0,40	0,24	0,02	37,5	47,2	9,2	5,6	0,5	82		8.33	1.58	5.18	4.01	3.28	3.02	2.52	2.24	1.92	1.43	4.16	1.21	1.04	0.92	0.91	3.55	2.44	7.46	7.66	5.67	3.23	8.13	3.22	3.14	1.79
170	14	M	5,72	4,86	14,6	42,8	88,1	30,1	34,2	223	12,9	8,2	2,81	1,95	0,73	0,18	0,03	49,2	34,3	12,8	3,2	0,5	88		8.33	1.58	5.17	4.01	3.28	3.02	2.52	2.24	1.92	1.42	4.17	1.21	1.05	0.94	0.92	3.55	2.44	7.46	7.68	5.67	3.23	8.13	3.22	3.14	1.79
172	16	M	4,69	4,71	14,1	41	87,1	30,1	34,5	199	12,8	9	2,64	1,37	0,52	0,13	0,02	56,3	29,4	11	2,8	0,5	79		8.33	1.58	5.19	4.01	3.29	3.02	2.52	2.24	1.92	1.45	4.14	1.21	1.06	0.92	0.91	3.55	2.44	7.46	7.68	5.67	3.23	8.12	3.22	3.14	1.79
169	14	M	5,14	4,61	13,9	41,4	89,8	30,1	33,6	223	13,5	9,2	1,74	2,69	0,5	0,17	0,02	34	52,4	9,8	3,4	0,4	81		8.33	1.58	5.19	4.01	3.28	3.02	2.52	2.24	1.91	1.44	4.16	1.21	1.04	0.92	0.91	3.55	2.44	7.46	7.68	5.67	3.23	8.13	3.22	3.17	1.79
167	16	K	4,64	4,86	12,8	38,2	78,5	26,4	33,6	282	16,8	9,4	1,88	2,08	0,43	0,18	0,05	40,5	45,3	9,3	3,9	1,0	92		8.33	1.58	5.18	4.01	3.28	3.02	2.52	2.24	1.91	1.45	4.16	1.21	1.04	0.92	0.91	3.55	2.44	7.47	7.68	5.67	3.23	8.14	3.22	3.17	1.79
166	15	K	5,63	4,59	13,1	38,5	83,9	28,5	34	246	12,1	9,2	2,86	1,84	0,80	0,08	0,03	51,1	32,7	14,3	1,4	0,5	76		8.33	1.58	5.16	4.01	3.28	3.03	2.52	2.24	1.92	1.44	4.17	1.21	1.04	0.92	0.9	3.55	2.44	7.46	7.68	5.67	3.23	8.12	3.22	3.17	1.79
173	17	M	5,86	5,5	14,9	45,2	82	27,1	33	218	14,2	9,4	2,63	2,47	0,55	0,15	0,04	45,3	42,2	9,3	2,5	0,7	96		8.33	1.58	5.17	4.01	3.28	3.02	2.52	2.24	1.9	1.42	4.17	1.21	1.04	0.92	0.9	3.55	2.44	7.46	7.68	5.67	3.23	8.13	3.22	3.14	1.79
163	15	K	7,46	4,98	13,4	41,2	82,6	27	32,6	310	16,2	9,9	4,41	2,3	0,58	0,14	0,01	59,3	30,9	7,7	1,9	0,2	74		8.33	1.58	5.19	4.01	3.28	3.02	2.52	2.24	1.91	1.45	4.17	1.21	1.04	0.92	0.91	3.55	2.44	7.46	7.65	5.67	3.23	8.13	3.22	3.17	1.79
174	15	M	4,28	5,15	15,4	44,5	86,4	30	34,7	279	14,3	9,6	1,41	2,04	0,60	0,16	0,06	33,2	47,4	14,1	3,9	1,4	85		8.33	1.58	5.18	4.01	3.28	3.02	2.52	2.24	1.91	1.45	4.16	1.21	1.05	0.95	0.91	3.55	2.44	7.46	7.66	5.67	3.23	8.13	3.21	3.14	1.79
158	15	K	6,25	4,85	11,9	35,5	73,2	24,5	33,4	16	322	10,5	2,70	2,51	0,67	0,31	0,05	43,3	40,3	40,2	10,7	5,0	84		8.33	1.58	5.18	4.01	3.28	3.02	2.52	2.24	1.91	1.44	4.16	1.21	1.05	0.94	0.92	3.55	2.44	7.46	7.66	5.67	3.23	8.13	3.22	3.14	1.79
161	16	K	5,59	4,05	11,8	35,1	86,8	29,1	33,6	237	13,3	9,3	2,87	2,01	0,64	0,05	0,01	51,4	36,1	11,5	0,8	0,2	84		8.33	1.58	5.17	4.01	3.28	3.02	2.52	2.24	1.91	1.42	4.17	1.21	1.04	0.92	0.91	3.55	2.44	7.47	7.66	5.67	3.23	8.14	3.22	3.14	1.79
139	11	K	5,27	4,68	13,8	40,3	86,1	29,5	34,2	338	12,5	9,4	2,65	1,98	0,33	0,26	0,02	50,7	37,7	6,4	4,9	0,3	78		8.33	1.58	5.18	4.01	3.28	3.02	2.52	2.24	1.92	1.42	4.18	1.21	1.06	0.92	0.91	3.55	2.44	7.46	7.68	5.67	3.24	8.12	3.22	3.14	1.79
141	11	K	3,77	4,83	13,5	39,5	81,7	28	34,3	250	15,3	9,2	1,63	1,75	0,33	0,05	0,01	43,3	46,3	8,8	1,3	0,3	83		8.33	1.58	5.17	4.01	3.28	3.02	2.52	2.24	1.92	1.42	4.16	1.21	1.04	0.92	0.91	3.55	2.44	7.46	7.67	5.67	3.23	8.13	3.22	3.13	1.79
135	11	K	3,99	4,89	13,1	38,2	78	26,7	34,2	261	15,4	8,5	1,19	2,39	0,33	0,07	0,01	29,9	60	8,3	1,6	0,2	80		8.33	1.58	5.16	4.01	3.28	3.02	2.52	2.24	1.92	1.42	4.18	1.21	1.05	0.92	0.91	3.55	2.44	7.46	7.65	5.67	3.24	8.13	3.22	3.13	1.79
																								statystyka	formate	arginine	αH1 glucose	glucose	βH2 glucose	creatinine	citrate	aceton	acetoacetate	alanina	lactate	β-hydroxybutyrate	valina	leucyna	isoleucyna	glycine	glutamina	phenylalanine	histamina	uridine dipphoshate-glucose	glycerophospocholine (GPC)	guanosine monophoshate (GMP)	phospocholine	citrulline	lysine
																									1	1	1	1	1	1	1	1	1	1	1	1	1	1	1	1	1	1	1	1	1	1	1	1	1
																									1	1	1	1	1	1	1	1	1	1	1	1	1	1	1	1	1	1	1	1	1	1	1	1	1
																									1	1	1	1	1	1	1	1	1	1	1	1	1	1	1	1	1	1	1	1	1	1	1	1	1
																									1	1	1	1	1	1	1	1	1	1	1	1	1	1	1	1	1	1	1	1	1	1	1	1	1
																									1	1	1	1	1	1	1	1	1	1	1	1	1	1	1	1	1	1	1	1	1	1	1	1	1
																									1	1	1	1	1	1	1	1	1	1	1	1	1	1	1	1	1	1	1	1	1	1	1	1	1
																									1	1	1	1	1	1	1	1	1	1	1	1	1	1	1	1	1	1	1	1	1	1	1	1	1
																									1	1	1	1	1	1	1	1	1	1	1	1	1	1	1	1	1	1	1	1	1	1	1	1	1
																									1	1	1	1	1	1	1	1	1	1	1	1	1	1	1	1	1	1	1	1	1	1	1	1	1
																									1	1	1	1	1	1	1	1	1	1	1	1	1	1	1	1	1	1	1	1	1	1	1	1	1
																									1	1	1	1	1	1	1	1	1	1	1	1	1	1	1	1	1	1	1	1	1	1	1	1	1
																									1	1	1	1	1	1	1	1	1	1	1	1	1	1	1	1	1	1	1	1	1	1	1	1	1
																									1	1	1	1	1	1	1	1	1	1	1	1	1	1	1	1	1	1	1	1	1	1	1	1	1
																									1	1	1	1	1	1	1	1	1	1	1	1	1	1	1	1	1	1	1	1	1	1	1	1	1
																									1	1	1	1	1	1	1	1	1	1	1	1	1	1	1	1	1	1	1	1	1	1	1	1	1
																									1	1	1	1	1	1	1	1	1	1	1	1	1	1	1	1	1	1	1	1	1	1	1	1	1
																									1	1	1	1	1	1	1	1	1	1	1	1	1	1	1	1	1	1	1	1	1	1	1	1	1
																									1	1	1	1	1	1	1	1	1	1	1	1	1	1	1	1	1	1	1	1	1	1	1	1	1
																									1	1	1	1	1	1	1	1	1	1	1	1	1	1	1	1	1	1	1	1	1	1	1	1	1
																									1	1	1	1	1	1	1	1	1	1	1	1	1	1	1	1	1	1	1	1	1	1	1	1	1
[truncated: 2 more columns]

## Sheet: cerebrospinal fluid
	Wiek	Waga / wzrost	płeć k/m	Białko [mg/dl]	Gluk [mg/dl]	zliczone komórki	limf	limfoid	mono	bazof	makro	erytr [1-pojedyncze, 2- liczne]	mononukl	mononukl%	polimorfonukleary	polimorfonukleary%	Pleocyt [tys/ul]		alanine	arginine	glycine	leucine	tyrosine	citrate	valine	acetate	creatinine	pyruvate	lactate	3-hydroxyisovalerate	phenylalanine	isoleucine	2-hydroxybutyrate	glutamine	histidine	formate	isobutyrate	acetone	glucose	citrulline	lysine	myo-inositol	cyllo-inositol	GABA
1	2 lata	12kg / 84cm	k	BRAK OZNACZEŃ Z DNIA POBRANIA														NMR chemical shift [ppm] - 1H NMR (600 MHz, H2O+D2O)	1.37	1.6	3.59	1.06	6.75	2.57	0.96	1.91	2.93	2.41	4.02	1.18	7.2	0.92	0.85	2.44	7.51	8.34	1.06	2.26	5.13	3.15	1.71	4.07	3.36	1.81
2	3 3/12 lat	17kg / 104cm	m	22	47	32	30	0	2	0	0	1	0	0	1	100	0.001		1.35	1.56	3.55	1.01	6.76	2.55	0.96	1.93	3.03	2.4	4.03	1.1	7.21	0.91	0.83	2.43	7.51	8.34	1.07	2.25	5.12	3.16	0	4.07	3.37	1.81
3	15 10/12 lat	51,6kg / 162cm	k	31	50	9	4	0	5	0	0	1	1	100	0	0	0.001		1.35	1.6	3.56	1.03	6.78	2.53	1.01	1.93	3.03	2.32	4.02	1.18	7.21	0.95	0.86	2.44	7.51	8.34	1.06	2.25	5.13	3.17	1.71	4.07	3.36	1.81
6	17 2/12 lat	66,5kg/ 172cm	m	TYLKO Morfologia brak PMR z tego dnia															1.35	1.6	3.55	1.06	6.89	2.57	0.96	1.91	3.04	2.41	4.02	1.17	7.2	0.96	0.86	2.44	7.61	8.34	1.07	2.25	5.13	3.17	1.71	4.07	3.36	1.81
7	7 6/12 lat	21,6kg / 122cm	m	29	71	100	7	1	88	0	4	0	35	97.3	1	2.7	0.036		1.37	1.61	3.55	1.03	6.78	2.57	1.03	1.91	3.04	2.41	4.02	1.18	7.3	0.97	0.87	2.44	7.6	8.34	1.06	2.22	5.13	3.16	1.72	4.08	3.36	1.81
8	5 lat	19,8kg / 107cm	m	15	56	5	3	0	2	0	0	1	0	0	0	0	0.001		1.37	1.55	3.55	0.99	6.75	2.57	1.04	1.91	3.04	2.41	4.02	1.21	7.2	0.96	0.89	2.44	7.61	8.34	1.07	2.21	5.13	3.17	1.72	4.07	3.36	1.81
11	3 4/12 lat	15,4kg / 101cm	m	13	61	1	0	0	1	0	0	0	2	100	0	0	0.002		1.37	1.55	3.55	1	6.75	2.57	1.02	1.92	3.04	2.41	4.06	1.19	7.2	0.96	0.84	2.44	7.61	8.34	1.06	2.21	5.13	3.17	1.7	4.06	3.36	1.81
12	1 11/12 lat	9,2kg / 83cm	m	26	39	69	14	1	20	0	0	2	4	66.6	2	33.4	0.007		1.37	1.58	3.55	1	6.82	2.56	1.03	1.92	3.03	2.4	4.05	1.17	7.2	0.96	0.83	2.43	7.61	8.34	1.07	2.21	5.13	3.16	1.71	4.05	3.36	1.8
13	15 10/12 lat	57,2kg / 170cm	k	18	59	24	18	4	0	0	0	1	1	100	0	0	0.001		1.37	1.58	3.55	1.01	6.74	2.55	1.05	1.91	3.03	2.4	4.02	1.2	7.2	0.96	0.9	2.43	7.61	8.34	1.06	2.15	5.12	3.16	1.71	4.07	3.36	1.8
14	2 5/12 lat	12,7kg / 86cm	k	BRAK FOLDERU Z DANYMI															1.35	1.57	3.55	1.01	6.74	2.57	1.02	1.91	2.93	2.31	4.02	1.17	7.2	0.97	0.91	2.41	7.57	8.34	1.06	2.26	5.13	3.16	7.71	4.07	3.36	1.81
16	2 10/12 lat	18,2kg / 110cm	m	14	56	30	25	1	3	1	0	2	2	100	0	0	0.002		1.37	1.55	3.55	1.01	6.74	2.57	1.02	1.91	3.05	2.41	4.02	1.17	7.2	0.97	0.91	2.41	7.6	8.34	1.06	2.26	5.13	3.17	1.7	4.07	3.36	1.81
17	5 2/12 lat	23,8 kg / 110cm	m	22	74	5	2	0	3	0	0	0	2	100	0	0	0.002		1.37	1.6	3.55	1	6.75	2.57	1.03	1.91	3.05	2.31	4.02	1.18	7.2	0.96	0.86	2.41	7.61	8.34	1.06	2.26	5.13	3.17	1.71	4.07	3.36	1.81
18	3 9/12 lat	17,8kg / 104cm	k	19	66	4	3	0	1	0	0	1	1	100	0	0	0.001		1.37	1.6	3.55	1.03	6.74	2.57	0.96	1.91	3.04	2.31	4.02	1.17	7.21	0.95	0.87	2.41	7.61	8.34	1.06	2.26	5.13	3.17	1.71	4.07	3.36	1.81
19	4 9/12 lat	20,3kg / 112cm	k	19	53	11	4	1	4	2	0	2	1	100	0	0	0.001		0	1.57	3.55	0.96	6.76	2.57	0.96	1.91	3.05	2.36	4.02	1.18	7.2	0.95	0.88	2.41	7.75	8.34	1.07	2.22	5.12	3.16	1.73	4.07	3.36	1.81
20	13 5/12 lat	60kg / 174cm	m	27	61	0	0	0	0	0	0	0	0	0	0	0	0		1.35	1.58	3.55	1.04	6.74	2.57	1.02	1.91	3.04	2.31	4.02	1.17	7.21	0.96	0.85	2.41	7.61	8.34	1.06	2.26	5.13	3.17	1.71	4.07	3.36	1.81
26	13 5/12 lat	48,5kg / 160cm	k	BRAK OZNACZEŃ Z DNIA POBRANIA															1.35	1.55	3.55	1.01	6.73	2.55	0.96	1.91	3.03	2.31	4.02	1.2	7.21	0.95	0.9	2.43	7.6	8.34	1.06	2.26	5.13	3.16	1.71	4.07	3.36	1.81
29	17 11/12 lat	51kg / 172cm	m	TYLKO Morfologia brak PMR z tego dnia															1.35	1.58	3.55	0.99	6.75	2.57	1.02	1.91	3.09	2.31	4.02	1.17	7.21	0.96	0.86	2.44	7.6	8.34	1.06	2.26	5.13	3.17	1.71	4.07	3.36	1.8
30	2 4/12 lat	13kg / 87cm	m	TYLKO Morfologia brak PMR z tego dnia															1.35	1.58	3.55	1	6.76	2.57	1.02	1.91	3.04	2.31	4.02	1.18	7.21	0.96	0.87	2.41	7.61	8.33	1.07	2.26	5.13	3.17	1.71	4.07	3.36	1.81
32	2 6/12 lat	11,9kg / 85cm	k	21	48	0	0	0	0	0	0	0	0	0	0	0	0		1.37	1.56	3.55	1	6.78	2.57	1.02	1.91	3.04	2.32	4.05	1.17	7.2	0.96	0.86	2.41	7.61	8.34	1.06	2.26	5.13	3.17	1.71	4.05	3.36	1.81
33	3 7/12 lat	17kg / 102 cm	k	41	52	100	46	2	50	0	2	1	0	0	1	100	0.001		1.35	1.58	3.55	1.01	6.74	2.57	1.03	1.91	3.03	2.31	4.02	1.17	7.21	0.91	0.81	2.43	7.6	8.34	1.06	2.25	5.13	3.16	1.71	4.07	3.36	1.81
35	6 7/12 lat	20kg / 116cm	m	20.2	43	0	0	0	0	0	0	0	0	0	0	0	0		1.31	1.58	3.55	0.99	6.69	2.57	1.02	1.91	3.04	2.31	4.08	1.21	7.32	0.96	0.89	2.41	7.51	8.34	1.07	2.25	5.13	3.16	1.71	4.08	3.36	1.81
				Białko [mg/dl]	Gluk [mg/dl]	zliczone komórki	limf	limfoid	mono	bazof	makro	erytr [1-pojedyncze, 2- liczne]	mononukl	mononukl%	polimorfonukleary	polimorfonukleary%	Pleocyt [tys/ul]		alanine	arginine	glycine	leucine	tyrosine	citrate	valine	acetate	creatinine	pyruvate	lactate	3-hydroxyisovalerate	phenylalanine	isoleucine	2-hydroxybutyrate	glutamine	histidine	formate	isobutyrate	acetone	glucose	citrulline	lysine	myo-inositol	cyllo-inositol	GABA
				0	0	0	0	0	0	0	0	0	0	0	0	0	0	statystyka	1	1	1	1	1	1	1	1	1	1	1	1	1	1	1	1	1	1	1	1	1	1	1	1	1	1
				1	1	1	1	0	1	0	0	1	0	0	1	1	1		1	1	1	1	1	1	1	1	1	1	1	1	1	1	1	1	1	1	1	1	1	1	1	1	1	1
				1	1	1	1	0	1	0	0	1	1	1	0	0	1		1	1	1	1	1	1	1	1	1	1	1	1	1	1	1	1	1	1	1	1	1	1	1	1	1	1
				0	0	0	0	0	0	0	0	0	0	0	0	0	0		1	1	1	1	1	1	1	1	1	1	1	1	1	1	1	1	1	1	1	1	1	1	1	1	1	1
				1	1	1	1	1	1	0	1	0	1	1	1	1	1		1	1	1	1	1	1	1	1	1	1	1	1	1	1	1	1	1	1	1	1	1	1	1	1	1	1
				1	1	1	1	0	1	0	0	1	0	0	0	0	1		1	1	1	1	1	1	1	1	1	1	1	1	1	1	1	1	1	1	1	1	1	1	1	1	1	1
				1	1	1	0	0	1	0	0	0	2	1	0	0	1		1	1	1	1	1	1	1	1	1	1	1	1	1	1	1	1	1	1	1	1	1	1	1	1	1	1
				1	1	1	1	1	1	0	0	1	1	1	1	1	1		1	1	1	1	1	1	1	1	1	1	1	1	1	1	1	1	1	1	1	1	1	1	1	1	1	1
				1	1	1	1	1	0	0	0	1	1	1	0	0	1		1	1	1	1	1	1	1	1	1	1	1	1	1	1	1	1	1	1	1	1	1	1	1	1	1	1
				0	0	0	0	0	0	0	0	0	0	0	0	0	0		1	1	1	1	1	1	1	1	1	1	1	1	1	1	1	1	1	1	1	1	1	1	1	1	1	1
				1	1	1	1	1	1	1	0	1	1	1	0	0	1		1	1	1	1	1	1	1	1	1	1	1	1	1	1	1	1	1	1	1	1	1	1	1	1	1	1
				1	1	1	1	0	1	0	0	0	1	1	0	0	1		1	1	1	1	1	1	1	1	1	1	1	1	1	1	1	1	1	1	1	1	1	1	1	1	1	1
				1	1	1	1	0	1	0	0	1	1	1	0	0	1		1	1	1	1	1	1	1	1	1	1	1	1	1	1	1	1	1	1	1	1	1	1	1	1	1	1
				1	1	1	1	1	1	1	0	1	1	1	0	0	1		0	1	1	1	1	1	1	1	1	1	1	1	1	1	1	1	1	1	1	1	1	1	1	1	1	1
				1	1	0	0	0	0	0	0	0	0	0	0	0	0		1	1	1	1	1	1	1	1	1	1	1	1	1	1	1	1	1	1	1	1	1	1	1	1	1	1
				0	0	0	0	0	0	0	0	0	0	0	0	0	0		1	1	1	1	1	1	1	1	1	1	1	1	1	1	1	1	1	1	1	1	1	1	1	1	1	1
				0	0	0	0	0	0	0	0	0	0	0	0	0	0		1	1	1	1	1	1	1	1	1	1	1	1	1	1	1	1	1	1	1	1	1	1	1	1	1	1
				0	0	0	0	0	0	0	0	0	0	0	0	0	0		1	1	1	1	1	1	1	1	1	1	1	1	1	1	1	1	1	1	1	1	1	1	1	1	1	1
				1	1	0	0	0	0	0	0	0	0	0	0	0	0		1	1	1	1	1	1	1	1	1	1	1	1	1	1	1	1	1	1	1	1	1	1	1	1	1	1
				1	1	1	1	1	1	0	1	1	0	0	1	1	1		1	1	1	1	1	1	1	1	1	1	1	1	1	1	1	1	1	1	1	1	1	1	1	1	1	1
				1	1	0	0	0	0	0	0	0	0	0	0	0	0		1	1	1	1	1	1	1	1	1	1	1	1	1	1	1	1	1	1	1	1	1	1	1	1	1	1

## Sheet: plasma
	Wiek	Waga/wzrost	Rozpozn.	typ	Risk-L,S,M,H,		CNS	płeć k/m	Leukocyty	Erytrocyty	Hb	Ht	MCV	MCH	MCHC	RDW-SD	RDW-CV	PLT	PDW	MPV	P-LCR	PCT	Neu%	Limf%	Mono%	Eoz%	Baz%	Grupa	formate	Arginine	αH1 glucoseglucose		βH2 glucose	creatinine	citrate	aceton	acetoacetate	alanina	lactate	β-hydroxybutyrate	valina	leucyna	isoleucyna	glycine	glutamina	phenylalanine	histamina	uridine dipphoshate-glucose	glycerophospocholine (GPC)
1	2 lata	12kg / 84cm	k	BRAK OZNACZEŃ Z DNIA POBRANIA																			białaczka	8.34	1.58	5.19	4	3.29	3.03	2.63	2.28	1.92	1.45	4.15	1.2	1.06	0.9	0.75	3.55	2.42	7.4	7.68	5.67	3.23	8.14	3.22	3.14	1.71	4.05
2	3 3/12 lat	17kg / 104cm	m	0.87	3.52	9.8	28	79.5	27.8	35	35.9	12.6	87	10.6	10.9	28.8	0.09	5.8	90.8	2.3	1.1	0	białaczka	8.34	1.58	5.17	4	3.29	2.92	2.57	2.2	1.95	1.42	1.16	1.21	1.08	0.92	0.91	3.55	2.42	7.4	7.68	5.67	3.24	8.14	3.22	3.14	1.71	4.04
3	15 10/12 lat	51,6kg / 162cm	k	1.66	3.12	9.9	28.6	91.7	31.7	34.6	50.4	15.2	52	15.4	11.2	40	0.04	75.3	20.5	4.2	0	0	białaczka	8.34	1.57	5.26	4.01	3.29	2.99	2.57	2.2	1.96	1.46	4.15	1.21	1.02	0.99	0.92	3.55	2.43	7.44	7.64	5.67	3.24	8.12	3.24	3.18	1.71	4.04
6	17 2/12 lat	66,5kg/ 172cm	m	8.48	4.14	12.9	34.8	84.1	31.2	37.1	34.6	11.3	228	10.2	9.6	20.7	0.22	88.1	8.5	3.3	0	0.1	białaczka	8.35	1.59	5.16	4	3.28	2.89	2.58	2.28	2.1	1.42	4.17	1.2	1.11	0.95	0.91	3.55	2.43	7.39	7.68	5.67	3.24	8.13	3.24	3.17	1.71	4.05
7	7 6/12 lat	21,6kg / 122cm	m	0.29	3.24	9.6	26.9	83	29.6	35.7	41.7	14	49	9.3	10.4	24.9	0.05	41.4	55.2	3.4	0	0	białaczka	8.34	1.58	5.17	4.01	3.28	3.03	2.5	2.21	1.99	1.42	4.18	1.21	1.06	0.96	0.95	3.55	2.42	7.39	7.68	5.67	3.24	8.13	3.22	3.15	1.71	4.04
8	5 lat	19,8kg / 107cm	m	0.34	3.1	8.7	25.4	81.9	28.1	34.3	44.1	15	37	10.1	9.4	19.8	0.03	29.5	58.8	5.9	2.9	2.9	białaczka	8.34	1.55	5.13	4.01	3.28	3.04	2.57	2.21	1.91	1.43	4.17	1.21	1.04	0.99	0.96	3.55	2.41	7.46	7.68	5.67	3.23	8.13	3.22	3.14	1.76	4.06
11	3 4/12 lat	15,4kg / 101cm	m	0.87	2.85	8.7	23.6	82.8	30.5	36.9	38.9	13	67	13.1	13	43	0.09	6.9	29.9	63.2	0	0	białaczka	8.34	1.58	5.18	4	3.28	3.03	2.57	2.22	2	1.44	4.14	1.2	1.04	0.92	0.9	3.54	2.42	7.39	7.68	5.67	3.24	8.13	3.24	3.18	1.71	4.05
12	1 11/12 lat	9,2kg / 83cm	m	6.02	2.82	8.4	24	85.1	29.8	35	42.4	13.5	176	9.8	10.2	24.4	0.18	44.3	22.1	33.2	0.2	0.2	białaczka	8.34	1.58	5.17	4	3.28	3.03	2.56	2.22	1.99	1.45	4.15	1.2	1.04	0.96	0.94	3.55	2.42	7.4	7.64	5.67	3.24	8.13	3.22	3.17	1.71	4.06
13	15 10/12 lat	57,2kg / 170cm	k	61.09	2.57	7.6	23.6	91.8	29.6	32.2	51.9	16.9	79	10.1	9.5	22.6	0.07	1.3	niemozliwe do ozn	niemozliwe do ozn	0	0.1	białaczka	8.34	1.58	5.16	4	3.28	2.92	2.59	2.22	1.96	1.45	4.14	1.2	1.05	0.91	0.9	3.55	2.43	7.4	7.64	5.67	3.24	8.14	3.22	3.16	1.71	4.04
14	2 5/12 lat	12,7kg / 86cm	k	BRAK FOLDERU Z DANYMI																			białaczka	8.33	1.57	5.19	4	3.24	3.03	2.59	2.22	1.96	1.46	4.15	1.2	1.06	0.92	0.9	3.55	2.43	7.4	7.64	5.67	3.24	8.14	3.24	3.18	1.72	4.04
16	2 10/12 lat	18,2kg / 110cm	m	1.57	3.02	8.7	27.4	90.7	28.8	31.8	52.2	18.6	284	11.7	11.3	32.5	0.32	35.7	59.2	4.5	0.6	0	białaczka	8.34	1.6	5.18	4	3.28	2.92	2.59	2.22	2	1.43	4.17	1.2	1.07	0.92	0.9	3.55	2.42	7.45	7.64	5.68	3.24	8.14	3.24	3.17	1.7	4.04
17	5 2/12 lat	23,8 kg / 110cm	m	TYLKO PMR brak Morfologi z tego dnia																			białaczka	8.34	1.58	5.16	4	3.28	3.03	2.59	2.22	1.96	1.43	4.17	1.2	1.04	0.96	0.94	3.55	2.42	7.4	7.64	5.67	3.24	8.12	3.24	3.14	1.72	4.05
18	3 9/12 lat	17,8kg / 104cm	k	2.87	3.98	12.3	34.4	86.4	30.9	35.8	38	12	187	9	9.2	17.7	0.17	81.2	16	2.8	0	0	białaczka	8.33	1.58	5.18	4	3.28	3.08	2.59	2.22	1.97	1.43	4.16	1.2	1.05	0.92	0.91	3.55	2.42	7.4	7.64	5.67	3.24	8.13	3.22	3.18	1.72	4.05
19	4 9/12 lat	20,3kg / 112cm	k	TYLKO PMR brak Morfologi z tego dnia																			białaczka	8.34	1.59	5.18	4	3.29	2.99	2.56	2.21	2.01	1.43	4.18	1.21	1.05	0.92	0.91	3.55	2.43	7.4	7.64	5.67	3.24	8.14	3.24	3.14	1.72	4.04
20	13 5/12 lat	60kg / 174cm	m	2.08	2.95	9	25.8	87.5	30.5	34.9	45.7	14.5	91	12.3	11.2	33.1	0.1	42.8	41.8	3.4	11.5	0.5	białaczka	8.34	1.58	5.16	4	3.29	3.03	2.58	2.25	1.96	1.44	4.18	1.2	1.05	0.95	0.92	3.55	2.43	7.4	7.64	5.67	3.24	8.13	3.24	3.18	1.69	4.05
26	13 5/12 lat	48,5kg / 160cm	k	BRAK OZNACZEŃ Z DNIA POBRANIA																			białaczka
29	17 11/12 lat	51kg / 172cm	m	0.98	2.94	10.3	29.2	99.3	35	35.3	48.1	13.3	169	10.3	10.3	25.4	0.17	68.4	22.4	9.2	0	0	białaczka
30	2 4/12 lat	13kg / 87cm	m	1.82	3.05	8.9	25.7	84.3	29.2	34.6	43.6	14.1	24	11.3	10.6	28.5	0.03	13.2	76.9	9.9	0	0	białaczka	8.34	1.59	5.19	4	3.28	2.99	2.57	2.25	1.96	1.45	4.14	1.2	1.04	1	0.95	3.55	2.43	7.44	7.64	5.67	3.24	8.13	3.23	3.18	1.72	4.04
32	2 6/12 lat	11,9kg / 85cm	k	3.62	2.83	8.5	23.7	83.7	30	35.9	35.7	11.6	65	10.9	10.6	29.1	0.07	12.4	72.4	14.6	0.6	0	białaczka	8.34	1.57	5.19	4.01	3.28	3.08	2.58	2.22	2	1.44	4.14	1.2	1.07	0.91	0.9	3.55	2.43	7.44	7.64	5.68	3.24	8.14	3.22	3.16	1.71	4.05
33	3 7/12 lat	17kg / 102 cm	k	TYLKO PMR brak Morfologi z tego dnia																			białaczka	8.34	1.58	5.19	4	3.29	3.08	2.56	2.22	2	1.45	4.14	1.2	1.07	0.91	0.9	3.55	2.43	7.44	7.64	5.68	3.24	8.14	3.22	3.15	1.69	4.04
34	6 7/12 lat	20kg / 116cm	m	2.09	3.68	10.6	30.9	84	28.8	34.3	46.7	15.5	428	11	10.7	28.9	0.41	6	83.6	9.9	0	0.5	białaczka	8.34	1.59	5.17	4	3.29	3.01	2.56	2.22	2	1.45	4.14	1.2	1.07	0.96	0.95	3.55	2.43	7.46	7.64	5.68	3.24	8.14	3.21	3.14	1.72	4.06
	14	168	M	4,34	4,96	14,3	43,6	87,9	28,9	32,9		13,8	148		11,5	1,95	1,78	0,5	0,09	0,02			kontrola	8.33	1.58	5.16	4.01	3.29	3.04	2.52	2.24	1.92	1,41sh	4.17	1.21	1.05	0.91	0.9	3.55	2.44	7.4	7.65	5.67	3.24	8.13	3.22	3.14	1.79	4.06
	13	156						K	5,19	4,71	13,5	40,9	86,7	28,6	33		13,3	218		10,4	1,95	2,61	0,41	0,17	0,03			kontrola	8.33	1.58	5.18	4.01	3.31	3.04	2.52	2.24	1.91	1.42	4.17	1.21	1.04	0.94	0.9	3.55	2.44	7.46	7.65	5.67	3.26
	16	171						M	6,86	4,82	15	45	93,4	31,2	33,4		13,2	173		11,5	4,04	1,91	0,74	0,13	0,02			kontrola	8.33	1.58	5.17	4.01	3.31	3.04	2.52	2.24	1.91	1.42	4.17	1.21	1.04	0.92	0.9	3.55	2.44	7.46	7.65	5.67	3.23
	12	159						K	6,33	4,77	13,1	38,8	81,3	27,4	33,6		14,7	221		9	2,81	2,86	0,43	0,19	0,02			kontrola	8.34	1.57	5.13	4.01	3.28	3.02	2.52	2.26	1.91	1.42	4.17	1.21	1.06	0.96	0.92	3.55	2.44	7.46	7.64	5.67	3.24
	15	170						M	3,77	5,24	16,1	48	91,7	30,8	33,6		13,3	181		9,4	1,68	1,53	0,47	0,08	0,01			kontrola	8.34	1.57	5.13	4.01	3.28	3.04	2.52	2.26	1.91	1.44	4.16	1.22	1.06	0.96	0.95	3.55	2.44	7.46	7.65	5.68	3.24
	17	160						K	6,08	4,5	14,7	43,9	97,4	32,6	33,5		12,8	228		9,6	3,64	1,71	0,6	0,08	0,03			kontrola	8.33	1.58	5.17	4.01	3.28	3.02	2.52	2.27	1.91	1.42	4.17	1.21	1.05	0.94	0.92	3.55	2.44	7.46	7.67	5.67	3.23
	12	140						K	4,36	4,39	13,4	39,4	89,6	30,5	34		13,6	206		9,8	1,63	2,06	0,40	0,24	0,02			kontrola	8.33	1.58	5.18	4.01	3.28	3.02	2.52	2.24	1.92	1.43	4.16	1.21	1.04	0.92	0.91	3.55	2.44	7.46	7.66	5.67	3.23
	14	170						M	5,72	4,86	14,6	42,8	88,1	30,1	34,2		12,9	223		8,2	2,81	1,95	0,73	0,18	0,03			kontrola	8.33	1.58	5.17	4.01	3.28	3.02	2.52	2.24	1.92	1.42	4.17	1.21	1.05	0.94	0.92	3.55	2.44	7.46	7.68	5.67	3.23
	16	172						M	4,69	4,71	14,1	41	87,1	30,1	34,5		12,8	199		9	2,64	1,37	0,52	0,13	0,02			kontrola	8.33	1.58	5.19	4.01	3.29	3.02	2.52	2.24	1.92	1.45	4.14	1.21	1.06	0.92	0.91	3.55	2.44	7.46	7.68	5.67	3.23
	14	169						M	5,14	4,61	13,9	41,4	89,8	30,1	33,6		13,5	223		9,2	1,74	2,69	0,5	0,17	0,02			kontrola	8.33	1.58	5.19	4.01	3.28	3.02	2.52	2.24	1.91	1.44	4.16	1.21	1.04	0.92	0.91	3.55	2.44	7.46	7.68	5.67	3.23
	16	167						K	4,64	4,86	12,8	38,2	78,5	26,4	33,6		16,8	282		9,4	1,88	2,08	0,43	0,18	0,05			kontrola	8.33	1.58	5.18	4.01	3.28	3.02	2.52	2.24	1.91	1.45	4.16	1.21	1.04	0.92	0.91	3.55	2.44	7.47	7.68	5.67	3.23
	15	166						K	5,63	4,59	13,1	38,5	83,9	28,5	34		12,1	246		9,2	2,86	1,84	0,80	0,08	0,03			kontrola	8.33	1.58	5.16	4.01	3.28	3.03	2.52	2.24	1.92	1.44	4.17	1.21	1.04	0.92	0.9	3.55	2.44	7.46	7.68	5.67	3.23
	17	173						M	5,86	5,5	14,9	45,2	82	27,1	33		14,2	218		9,4	2,63	2,47	0,55	0,15	0,04			kontrola	8.33	1.58	5.17	4.01	3.28	3.02	2.52	2.24	1.9	1.42	4.17	1.21	1.04	0.92	0.9	3.55	2.44	7.46	7.68	5.67	3.23
	15	163						K	7,46	4,98	13,4	41,2	82,6	27	32,6		16,2	310		9,9	4,41	2,3	0,58	0,14	0,01			kontrola	8.33	1.58	5.19	4.01	3.28	3.02	2.52	2.24	1.91	1.45	4.17	1.21	1.04	0.92	0.91	3.55	2.44	7.46	7.65	5.67	3.23
	15	174						M	4,28	5,15	15,4	44,5	86,4	30	34,7		14,3	279		9,6	1,41	2,04	0,60	0,16	0,06			kontrola	8.33	1.58	5.18	4.01	3.28	3.02	2.52	2.24	1.91	1.45	4.16	1.21	1.05	0.95	0.91	3.55	2.44	7.46	7.66	5.67	3.23
	15	158						K	6,25	4,85	11,9	35,5	73,2	24,5	33,4		322	16		10,5	2,70	2,51	0,67	0,31	0,05			kontrola	8.33	1.58	5.18	4.01	3.28	3.02	2.52	2.24	1.91	1.44	4.16	1.21	1.05	0.94	0.92	3.55	2.44	7.46	7.66	5.67	3.23
	16	161						K	5,59	4,05	11,8	35,1	86,8	29,1	33,6		13,3	237		9,3	2,87	2,01	0,64	0,05	0,01			kontrola	8.33	1.58	5.17	4.01	3.28	3.02	2.52	2.24	1.91	1.42	4.17	1.21	1.04	0.92	0.91	3.55	2.44	7.47	7.66	5.67	3.23
	11	139						K	5,27	4,68	13,8	40,3	86,1	29,5	34,2		12,5	338		9,4	2,65	1,98	0,33	0,26	0,02			kontrola	8.33	1.58	5.18	4.01	3.28	3.02	2.52	2.24	1.92	1.42	4.18	1.21	1.06	0.92	0.91	3.55	2.44	7.46	7.68	5.67	3.24
	11	141						K	3,77	4,83	13,5	39,5	81,7	28	34,3		15,3	250		9,2	1,63	1,75	0,33	0,05	0,01			kontrola	8.33	1.58	5.17	4.01	3.28	3.02	2.52	2.24	1.92	1.42	4.16	1.21	1.04	0.92	0.91	3.55	2.44	7.46	7.67	5.67	3.23
	11	135						K	3,99	4,89	13,1	38,2	78	26,7	34,2		15,4	261		8,5	1,19	2,39	0,33	0,07	0,01			kontrola	8.33	1.58	5.16	4.01	3.28	3.02	2.52	2.24	1.92	1.42	4.18	1.21	1.05	0.92	0.91	3.55	2.44	7.46	7.65	5.67	3.24
[truncated: 32 more columns]
